# Supplementary material
Source: publisher figshare collection journal article supplement (https://gsapubs.figshare.com/ndownloader/files/23319668)
Supplement: Supplementary file 1 [file 23319668]

## Sheet: Sheet1
TABLE DR6. MAMMAL LOCALITY DATA
Mammal Horizon*	Localities	Location	NALMA†	SJB Biozone§	Magnetic Chron	Stratigraphic Position (m)**	Estimated Age (Ma)
1	L-06342	De-Na-Zin	Pu2	H-T Zone	29n	8.0 - 10.5	65.68 - 65.63 (+0.01/-0.01)
	L-06343	De-Na-Zin	Pu2	H-T Zone	29n	8.0 - 10.5	65.68 - 65.63 (+0.01/-0.01)
	L-06344	De-Na-Zin	Pu2	H-T Zone	29n	8.0 - 10.5	65.68 - 65.63 (+0.01/-0.01)
	L-06346	De-Na-Zin	Pu2	H-T Zone	29n	8.0 - 10.5	65.68 - 65.63 (+0.01/-0.01)
	L-06347	De-Na-Zin	Pu2	H-T Zone	29n	8.0 - 10.5	65.68 - 65.63 (+0.01/-0.01)
	L-06348	De-Na-Zin	Pu2	H-T Zone	29n	8.0 - 10.5	65.68 - 65.63 (+0.01/-0.01)
	L-08342	De-Na-Zin	Pu2	H-T Zone	29n	8.0 - 10.5	65.68 - 65.63 (+0.01/-0.01)
	L-08343	De-Na-Zin	Pu2	H-T Zone	29n	8.0 - 10.5	65.68 - 65.63 (+0.01/-0.01)
	L-08344	De-Na-Zin	Pu2	H-T Zone	29n	8.0 - 10.5	65.68 - 65.63 (+0.01/-0.01)
	L-08601	De-Na-Zin	Pu2	H-T Zone	29n	8.0 - 10.5	65.68 - 65.63 (+0.01/-0.01)
	L-08865	De-Na-Zin	Pu2	H-T Zone	29n	8.0 - 10.5	65.68 - 65.63 (+0.01/-0.01)
	L-08866	De-Na-Zin	Pu2	H-T Zone	29n	8.0 - 10.5	65.68 - 65.63 (+0.01/-0.01)
	L-08867	De-Na-Zin	Pu2	H-T Zone	29n	8.0 - 10.5	65.68 - 65.63 (+0.01/-0.01)
	L-08868	De-Na-Zin	Pu2	H-T Zone	29n	8.0 - 10.5	65.68 - 65.63 (+0.01/-0.01)
	L-12078	De-Na-Zin	Pu2	H-T Zone	29n	8.0 - 10.5	65.68 - 65.63 (+0.01/-0.01)
2	L-00317	Betonnie Tsosie	Pu2	H-T Zone	29n	11.0 - 16.0	65.57 - 65.47 (+0.02/-0.04)
	L-00646	Betonnie Tsosie	Pu2	H-T Zone	29n	11.0 - 16.0	65.57 - 65.47 (+0.02/-0.04)
	L-00686	Betonnie Tsosie	Pu2	H-T Zone	29n	11.0 - 16.0	65.57 - 65.47 (+0.02/-0.04)
	L-00844	Betonnie Tsosie	Pu2	H-T Zone	29n	11.0 - 16.0	65.57 - 65.47 (+0.02/-0.04)
	L-01122	Betonnie Tsosie	Pu2	H-T Zone	29n	11.0 - 16.0	65.57 - 65.47 (+0.02/-0.04)
	L-01123	Betonnie Tsosie	Pu2	H-T Zone	29n	11.0 - 16.0	65.57 - 65.47 (+0.02/-0.04)
	L-01124	Betonnie Tsosie	Pu2	H-T Zone	29n	11.0 - 16.0	65.57 - 65.47 (+0.02/-0.04)
	L-02550	Betonnie Tsosie	Pu2	H-T Zone	29n	11.0 - 16.0	65.57 - 65.47 (+0.02/-0.04)
	L-02551	Betonnie Tsosie	Pu2	H-T Zone	29n	11.0 - 16.0	65.57 - 65.47 (+0.02/-0.04)
	L-02552	Betonnie Tsosie	Pu2	H-T Zone	29n	11.0 - 16.0	65.57 - 65.47 (+0.02/-0.04)
	L-05444	Betonnie Tsosie	Pu2	H-T Zone	29n	11.0 - 16.0	65.57 - 65.47 (+0.02/-0.04)
	L-05445	Betonnie Tsosie	Pu2	H-T Zone	29n	11.0 - 16.0	65.57 - 65.47 (+0.02/-0.04)
	L-05446	Betonnie Tsosie	Pu2	H-T Zone	29n	11.0 - 16.0	65.57 - 65.47 (+0.02/-0.04)
	L-05447	Betonnie Tsosie	Pu2	H-T Zone	29n	11.0 - 16.0	65.57 - 65.47 (+0.02/-0.04)
	L-05448	Betonnie Tsosie	Pu2	H-T Zone	29n	11.0 - 16.0	65.57 - 65.47 (+0.02/-0.04)
	L-06142	Betonnie Tsosie	Pu2	H-T Zone	29n	11.0 - 16.0	65.57 - 65.47 (+0.02/-0.04)
	L-06143	Betonnie Tsosie	Pu2	H-T Zone	29n	11.0 - 16.0	65.57 - 65.47 (+0.02/-0.04)
	L-06144	Betonnie Tsosie	Pu2	H-T Zone	29n	11.0 - 16.0	65.57 - 65.47 (+0.02/-0.04)
	L-06145	Betonnie Tsosie	Pu2	H-T Zone	29n	11.0 - 16.0	65.57 - 65.47 (+0.02/-0.04)
	L-06146	Betonnie Tsosie	Pu2	H-T Zone	29n	11.0 - 16.0	65.57 - 65.47 (+0.02/-0.04)
	L-06147	Betonnie Tsosie	Pu2	H-T Zone	29n	11.0 - 16.0	65.57 - 65.47 (+0.02/-0.04)
	L-06209	Betonnie Tsosie	Pu2	H-T Zone	29n	11.0 - 16.0	65.57 - 65.47 (+0.02/-0.04)
	L-06210	Betonnie Tsosie	Pu2	H-T Zone	29n	11.0 - 16.0	65.57 - 65.47 (+0.02/-0.04)
	L-06211	Betonnie Tsosie	Pu2	H-T Zone	29n	11.0 - 16.0	65.57 - 65.47 (+0.02/-0.04)
	L-06271	Betonnie Tsosie	Pu2	H-T Zone	29n	11.0 - 16.0	65.57 - 65.47 (+0.02/-0.04)
	L-06248	Betonnie Tsosie	Pu2	H-T Zone	29n	11.0 - 16.0	65.57 - 65.47 (+0.02/-0.04)
	L-06352	Betonnie Tsosie	Pu2	H-T Zone	29n	11.0 - 16.0	65.57 - 65.47 (+0.02/-0.04)
	L-06353	Betonnie Tsosie	Pu2	H-T Zone	29n	11.0 - 16.0	65.57 - 65.47 (+0.02/-0.04)
	L-06354	Betonnie Tsosie	Pu2	H-T Zone	29n	11.0 - 16.0	65.57 - 65.47 (+0.02/-0.04)
	L-06355	Betonnie Tsosie	Pu2	H-T Zone	29n	11.0 - 16.0	65.57 - 65.47 (+0.02/-0.04)
	L-06356	Betonnie Tsosie	Pu2	H-T Zone	29n	11.0 - 16.0	65.57 - 65.47 (+0.02/-0.04)
	L-06357	Betonnie Tsosie	Pu2	H-T Zone	29n	11.0 - 16.0	65.57 - 65.47 (+0.02/-0.04)
	L-06358	Betonnie Tsosie	Pu2	H-T Zone	29n	11.0 - 16.0	65.57 - 65.47 (+0.02/-0.04)
	L-06359	Betonnie Tsosie	Pu2	H-T Zone	29n	11.0 - 16.0	65.57 - 65.47 (+0.02/-0.04)
	L-06456	Betonnie Tsosie	Pu2	H-T Zone	29n	11.0 - 16.0	65.57 - 65.47 (+0.02/-0.04)
	L-06615	Betonnie Tsosie	Pu2	H-T Zone	29n	11.0 - 16.0	65.57 - 65.47 (+0.02/-0.04)
	L-06620	Betonnie Tsosie	Pu2	H-T Zone	29n	11.0 - 16.0	65.57 - 65.47 (+0.02/-0.04)
	L-07483	Betonnie Tsosie	Pu2	H-T Zone	29n	11.0 - 16.0	65.57 - 65.47 (+0.02/-0.04)
	L-08777	Betonnie Tsosie	Pu2	H-T Zone	29n	11.0 - 16.0	65.57 - 65.47 (+0.02/-0.04)
	L-09183	Betonnie Tsosie	Pu2	H-T Zone	29n	11.0 - 16.0	65.57 - 65.47 (+0.02/-0.04)
	L-09971	Betonnie Tsosie	Pu2	H-T Zone	29n	11.0 - 16.0	65.57 - 65.47 (+0.02/-0.04)
	L-09972	Betonnie Tsosie	Pu2	H-T Zone	29n	11.0 - 16.0	65.57 - 65.47 (+0.02/-0.04)
	L-10406	Betonnie Tsosie	Pu2	H-T Zone	29n	11.0 - 16.0	65.57 - 65.47 (+0.02/-0.04)
	L-10407	Betonnie Tsosie	Pu2	H-T Zone	29n	11.0 - 16.0	65.57 - 65.47 (+0.02/-0.04)
	L-10408	Betonnie Tsosie	Pu2	H-T Zone	29n	11.0 - 16.0	65.57 - 65.47 (+0.02/-0.04)
	L-10409	Betonnie Tsosie	Pu2	H-T Zone	29n	11.0 - 16.0	65.57 - 65.47 (+0.02/-0.04)
	L-10411	Betonnie Tsosie	Pu2	H-T Zone	29n	11.0 - 16.0	65.57 - 65.47 (+0.02/-0.04)
	L-10412	Betonnie Tsosie	Pu2	H-T Zone	29n	11.0 - 16.0	65.57 - 65.47 (+0.02/-0.04)
	L-10427	Betonnie Tsosie	Pu2	H-T Zone	29n	11.0 - 16.0	65.57 - 65.47 (+0.02/-0.04)
	L-10428	Betonnie Tsosie	Pu2	H-T Zone	29n	11.0 - 16.0	65.57 - 65.47 (+0.02/-0.04)
	L-10429	Betonnie Tsosie	Pu2	H-T Zone	29n	11.0 - 16.0	65.57 - 65.47 (+0.02/-0.04)
	L-10430	Betonnie Tsosie	Pu2	H-T Zone	29n	11.0 - 16.0	65.57 - 65.47 (+0.02/-0.04)
	L-10446	Betonnie Tsosie	Pu2	H-T Zone	29n	11.0 - 16.0	65.57 - 65.47 (+0.02/-0.04)
	L-10447	Betonnie Tsosie	Pu2	H-T Zone	29n	11.0 - 16.0	65.57 - 65.47 (+0.02/-0.04)
	L-10448	Betonnie Tsosie	Pu2	H-T Zone	29n	11.0 - 16.0	65.57 - 65.47 (+0.02/-0.04)
	L-10449	Betonnie Tsosie	Pu2	H-T Zone	29n	11.0 - 16.0	65.57 - 65.47 (+0.02/-0.04)
	L-10450	Betonnie Tsosie	Pu2	H-T Zone	29n	11.0 - 16.0	65.57 - 65.47 (+0.02/-0.04)
	L-10451	Betonnie Tsosie	Pu2	H-T Zone	29n	11.0 - 16.0	65.57 - 65.47 (+0.02/-0.04)
	L-10455	Betonnie Tsosie	Pu2	H-T Zone	29n	11.0 - 16.0	65.57 - 65.47 (+0.02/-0.04)
3	L-00684	Kimbeto	Pu2	H-T Zone	29n	6.2 - 10.0	65.49 - 65.34 (+0.03/-0.03)
	L-00685	Kimbeto	Pu2	H-T Zone	29n	6.2 - 10.0	65.49 - 65.34 (+0.03/-0.03)
	L-01121	Kimbeto	Pu2	H-T Zone	29n	6.2 - 10.0	65.49 - 65.34 (+0.03/-0.03)
	L-05200	Kimbeto	Pu2	H-T Zone	29n	6.2 - 10.0	65.49 - 65.34 (+0.03/-0.03)
	L-05201	Kimbeto	Pu2	H-T Zone	29n	6.2 - 10.0	65.49 - 65.34 (+0.03/-0.03)
	L-05202	Kimbeto	Pu2	H-T Zone	29n	6.2 - 10.0	65.49 - 65.34 (+0.03/-0.03)
	L-05203	Kimbeto	Pu2	H-T Zone	29n	6.2 - 10.0	65.49 - 65.34 (+0.03/-0.03)
	L-05204	Kimbeto	Pu2	H-T Zone	29n	6.2 - 10.0	65.49 - 65.34 (+0.03/-0.03)
	L-06345	Kimbeto	Pu2	H-T Zone	29n	6.2 - 10.0	65.49 - 65.34 (+0.03/-0.03)
	L-06349	Kimbeto	Pu2	H-T Zone	29n	6.2 - 10.0	65.49 - 65.34 (+0.03/-0.03)
	L-08233	Kimbeto	Pu2	H-T Zone	29n	6.2 - 10.0	65.49 - 65.34 (+0.03/-0.03)
	L-08869	Kimbeto	Pu2	H-T Zone	29n	6.2 - 10.0	65.49 - 65.34 (+0.03/-0.03)
	L-08870	Kimbeto	Pu2	H-T Zone	29n	6.2 - 10.0	65.49 - 65.34 (+0.03/-0.03)
	L-09179	Kimbeto	Pu2	H-T Zone	29n	6.2 - 10.0	65.49 - 65.34 (+0.03/-0.03)
	L-09180	Kimbeto	Pu2	H-T Zone	29n	6.2 - 10.0	65.49 - 65.34 (+0.03/-0.03)
	L-09181	Kimbeto	Pu2	H-T Zone	29n	6.2 - 10.0	65.49 - 65.34 (+0.03/-0.03)
	L-09182	Kimbeto	Pu2	H-T Zone	29n	6.2 - 10.0	65.49 - 65.34 (+0.03/-0.03)
	L-09875	Kimbeto	Pu2	H-T Zone	29n	6.2 - 10.0	65.49 - 65.34 (+0.03/-0.03)
	L-09894	Kimbeto	Pu2	H-T Zone	29n	6.2 - 10.0	65.49 - 65.34 (+0.03/-0.03)
	L-09895	Kimbeto	Pu2	H-T Zone	29n	6.2 - 10.0	65.49 - 65.34 (+0.03/-0.03)
	L-09899	Kimbeto	Pu2	H-T Zone	29n	6.2 - 10.0	65.49 - 65.34 (+0.03/-0.03)
	L-09976	Kimbeto	Pu2	H-T Zone	29n	6.2 - 10.0	65.49 - 65.34 (+0.03/-0.03)
	L-09977	Kimbeto	Pu2	H-T Zone	29n	6.2 - 10.0	65.49 - 65.34 (+0.03/-0.03)
4	L-00390	De-Na-Zin	Pu3	T-P Zone	29n	25.6 - 28.4	65.27 - 65.22 (+0.06/-0.06)
	L-00391	De-Na-Zin	Pu3	T-P Zone	29n	25.6 - 28.4	65.27 - 65.22 (+0.06/-0.06)
	L-00392	De-Na-Zin	Pu3	T-P Zone	29n	25.6 - 28.4	65.27 - 65.22 (+0.06/-0.06)
	L-00393	De-Na-Zin	Pu3	T-P Zone	29n	25.6 - 28.4	65.27 - 65.22 (+0.06/-0.06)
	L-00394	De-Na-Zin	Pu3	T-P Zone	29n	25.6 - 28.4	65.27 - 65.22 (+0.06/-0.06)
	L-00395	De-Na-Zin	Pu3	T-P Zone	29n	25.6 - 28.4	65.27 - 65.22 (+0.06/-0.06)
	L-00396	De-Na-Zin	Pu3	T-P Zone	29n	25.6 - 28.4	65.27 - 65.22 (+0.06/-0.06)
	L-00397	De-Na-Zin	Pu3	T-P Zone	29n	25.6 - 28.4	65.27 - 65.22 (+0.06/-0.06)
	L-00626	De-Na-Zin	Pu3	T-P Zone	29n	25.6 - 28.4	65.27 - 65.22 (+0.06/-0.06)
	L-00629	De-Na-Zin	Pu3	T-P Zone	29n	25.6 - 28.4	65.27 - 65.22 (+0.06/-0.06)
	L-00630	De-Na-Zin	Pu3	T-P Zone	29n	25.6 - 28.4	65.27 - 65.22 (+0.06/-0.06)
	L-00634	De-Na-Zin	Pu3	T-P Zone	29n	25.6 - 28.4	65.27 - 65.22 (+0.06/-0.06)
	L-00636	De-Na-Zin	Pu3	T-P Zone	29n	25.6 - 28.4	65.27 - 65.22 (+0.06/-0.06)
	L-00638	De-Na-Zin	Pu3	T-P Zone	29n	25.6 - 28.4	65.27 - 65.22 (+0.06/-0.06)
	L-00642	De-Na-Zin	Pu3	T-P Zone	29n	25.6 - 28.4	65.27 - 65.22 (+0.06/-0.06)
	L-00643	De-Na-Zin	Pu3	T-P Zone	29n	25.6 - 28.4	65.27 - 65.22 (+0.06/-0.06)
	L-00644	De-Na-Zin	Pu3	T-P Zone	29n	25.6 - 28.4	65.27 - 65.22 (+0.06/-0.06)
	L-00658	De-Na-Zin	Pu3	T-P Zone	29n	25.6 - 28.4	65.27 - 65.22 (+0.06/-0.06)
	L-00659	De-Na-Zin	Pu3	T-P Zone	29n	25.6 - 28.4	65.27 - 65.22 (+0.06/-0.06)
	L-00660	De-Na-Zin	Pu3	T-P Zone	29n	25.6 - 28.4	65.27 - 65.22 (+0.06/-0.06)
	L-00661	De-Na-Zin	Pu3	T-P Zone	29n	25.6 - 28.4	65.27 - 65.22 (+0.06/-0.06)
	L-00662	De-Na-Zin	Pu3	T-P Zone	29n	25.6 - 28.4	65.27 - 65.22 (+0.06/-0.06)
	L-00663	De-Na-Zin	Pu3	T-P Zone	29n	25.6 - 28.4	65.27 - 65.22 (+0.06/-0.06)
	L-00664	De-Na-Zin	Pu3	T-P Zone	29n	25.6 - 28.4	65.27 - 65.22 (+0.06/-0.06)
	L-00665	De-Na-Zin	Pu3	T-P Zone	29n	25.6 - 28.4	65.27 - 65.22 (+0.06/-0.06)
	L-00666	De-Na-Zin	Pu3	T-P Zone	29n	25.6 - 28.4	65.27 - 65.22 (+0.06/-0.06)
	L-00667	De-Na-Zin	Pu3	T-P Zone	29n	25.6 - 28.4	65.27 - 65.22 (+0.06/-0.06)
	L-00675	De-Na-Zin	Pu3	T-P Zone	29n	25.6 - 28.4	65.27 - 65.22 (+0.06/-0.06)
	L-00676	De-Na-Zin	Pu3	T-P Zone	29n	25.6 - 28.4	65.27 - 65.22 (+0.06/-0.06)
	L-00699	De-Na-Zin	Pu3	T-P Zone	29n	25.6 - 28.4	65.27 - 65.22 (+0.06/-0.06)
	L-01115	De-Na-Zin	Pu3	T-P Zone	29n	25.6 - 28.4	65.27 - 65.22 (+0.06/-0.06)
	L-01117	De-Na-Zin	Pu3	T-P Zone	29n	25.6 - 28.4	65.27 - 65.22 (+0.06/-0.06)
	L-01217	De-Na-Zin	Pu3	T-P Zone	29n	25.6 - 28.4	65.27 - 65.22 (+0.06/-0.06)
	L-01219	De-Na-Zin	Pu3	T-P Zone	29n	25.6 - 28.4	65.27 - 65.22 (+0.06/-0.06)
	L-01220	De-Na-Zin	Pu3	T-P Zone	29n	25.6 - 28.4	65.27 - 65.22 (+0.06/-0.06)
	L-01224	De-Na-Zin	Pu3	T-P Zone	29n	25.6 - 28.4	65.27 - 65.22 (+0.06/-0.06)
	L-01225	De-Na-Zin	Pu3	T-P Zone	29n	25.6 - 28.4	65.27 - 65.22 (+0.06/-0.06)
	L-01288	De-Na-Zin	Pu3	T-P Zone	29n	25.6 - 28.4	65.27 - 65.22 (+0.06/-0.06)
	L-01400	De-Na-Zin	Pu3	T-P Zone	29n	25.6 - 28.4	65.27 - 65.22 (+0.06/-0.06)
	L-01409	De-Na-Zin	Pu3	T-P Zone	29n	25.6 - 28.4	65.27 - 65.22 (+0.06/-0.06)
	L-02306	De-Na-Zin	Pu3	T-P Zone	29n	25.6 - 28.4	65.27 - 65.22 (+0.06/-0.06)
	L-02308	De-Na-Zin	Pu3	T-P Zone	29n	25.6 - 28.4	65.27 - 65.22 (+0.06/-0.06)
	L-02309	De-Na-Zin	Pu3	T-P Zone	29n	25.6 - 28.4	65.27 - 65.22 (+0.06/-0.06)
	L-02340	De-Na-Zin	Pu3	T-P Zone	29n	25.6 - 28.4	65.27 - 65.22 (+0.06/-0.06)
	L-02394	De-Na-Zin	Pu3	T-P Zone	29n	25.6 - 28.4	65.27 - 65.22 (+0.06/-0.06)
	L-02396	De-Na-Zin	Pu3	T-P Zone	29n	25.6 - 28.4	65.27 - 65.22 (+0.06/-0.06)
	L-03206	De-Na-Zin	Pu3	T-P Zone	29n	25.6 - 28.4	65.27 - 65.22 (+0.06/-0.06)
	L-03230	De-Na-Zin	Pu3	T-P Zone	29n	25.6 - 28.4	65.27 - 65.22 (+0.06/-0.06)
	L-03232	De-Na-Zin	Pu3	T-P Zone	29n	25.6 - 28.4	65.27 - 65.22 (+0.06/-0.06)
	L-03233	De-Na-Zin	Pu3	T-P Zone	29n	25.6 - 28.4	65.27 - 65.22 (+0.06/-0.06)
	L-03234	De-Na-Zin	Pu3	T-P Zone	29n	25.6 - 28.4	65.27 - 65.22 (+0.06/-0.06)
	L-03235	De-Na-Zin	Pu3	T-P Zone	29n	25.6 - 28.4	65.27 - 65.22 (+0.06/-0.06)
	L-03236	De-Na-Zin	Pu3	T-P Zone	29n	25.6 - 28.4	65.27 - 65.22 (+0.06/-0.06)
	L-03237	De-Na-Zin	Pu3	T-P Zone	29n	25.6 - 28.4	65.27 - 65.22 (+0.06/-0.06)
	L-03239	De-Na-Zin	Pu3	T-P Zone	29n	25.6 - 28.4	65.27 - 65.22 (+0.06/-0.06)
	L-03329	De-Na-Zin	Pu3	T-P Zone	29n	25.6 - 28.4	65.27 - 65.22 (+0.06/-0.06)
	L-04329	De-Na-Zin	Pu3	T-P Zone	29n	25.6 - 28.4	65.27 - 65.22 (+0.06/-0.06)
	L-04546	De-Na-Zin	Pu3	T-P Zone	29n	25.6 - 28.4	65.27 - 65.22 (+0.06/-0.06)
	L-05196	De-Na-Zin	Pu3	T-P Zone	29n	25.6 - 28.4	65.27 - 65.22 (+0.06/-0.06)
	L-05404	De-Na-Zin	Pu3	T-P Zone	29n	25.6 - 28.4	65.27 - 65.22 (+0.06/-0.06)
	L-05663	De-Na-Zin	Pu3	T-P Zone	29n	25.6 - 28.4	65.27 - 65.22 (+0.06/-0.06)
	L-05664	De-Na-Zin	Pu3	T-P Zone	29n	25.6 - 28.4	65.27 - 65.22 (+0.06/-0.06)
	L-05665	De-Na-Zin	Pu3	T-P Zone	29n	25.6 - 28.4	65.27 - 65.22 (+0.06/-0.06)
	L-05666	De-Na-Zin	Pu3	T-P Zone	29n	25.6 - 28.4	65.27 - 65.22 (+0.06/-0.06)
	L-05667	De-Na-Zin	Pu3	T-P Zone	29n	25.6 - 28.4	65.27 - 65.22 (+0.06/-0.06)
	L-05668	De-Na-Zin	Pu3	T-P Zone	29n	25.6 - 28.4	65.27 - 65.22 (+0.06/-0.06)
	L-05669	De-Na-Zin	Pu3	T-P Zone	29n	25.6 - 28.4	65.27 - 65.22 (+0.06/-0.06)
	L-05670	De-Na-Zin	Pu3	T-P Zone	29n	25.6 - 28.4	65.27 - 65.22 (+0.06/-0.06)
	L-05671	De-Na-Zin	Pu3	T-P Zone	29n	25.6 - 28.4	65.27 - 65.22 (+0.06/-0.06)
	L-05672	De-Na-Zin	Pu3	T-P Zone	29n	25.6 - 28.4	65.27 - 65.22 (+0.06/-0.06)
	L-05673	De-Na-Zin	Pu3	T-P Zone	29n	25.6 - 28.4	65.27 - 65.22 (+0.06/-0.06)
	L-05674	De-Na-Zin	Pu3	T-P Zone	29n	25.6 - 28.4	65.27 - 65.22 (+0.06/-0.06)
	L-05675	De-Na-Zin	Pu3	T-P Zone	29n	25.6 - 28.4	65.27 - 65.22 (+0.06/-0.06)
	L-05676	De-Na-Zin	Pu3	T-P Zone	29n	25.6 - 28.4	65.27 - 65.22 (+0.06/-0.06)
	L-05817	De-Na-Zin	Pu3	T-P Zone	29n	25.6 - 28.4	65.27 - 65.22 (+0.06/-0.06)
	L-05818	De-Na-Zin	Pu3	T-P Zone	29n	25.6 - 28.4	65.27 - 65.22 (+0.06/-0.06)
	L-05819	De-Na-Zin	Pu3	T-P Zone	29n	25.6 - 28.4	65.27 - 65.22 (+0.06/-0.06)
	L-05820	De-Na-Zin	Pu3	T-P Zone	29n	25.6 - 28.4	65.27 - 65.22 (+0.06/-0.06)
	L-05821	De-Na-Zin	Pu3	T-P Zone	29n	25.6 - 28.4	65.27 - 65.22 (+0.06/-0.06)
	L-05822	De-Na-Zin	Pu3	T-P Zone	29n	25.6 - 28.4	65.27 - 65.22 (+0.06/-0.06)
	L-05823	De-Na-Zin	Pu3	T-P Zone	29n	25.6 - 28.4	65.27 - 65.22 (+0.06/-0.06)
	L-05824	De-Na-Zin	Pu3	T-P Zone	29n	25.6 - 28.4	65.27 - 65.22 (+0.06/-0.06)
	L-05825	De-Na-Zin	Pu3	T-P Zone	29n	25.6 - 28.4	65.27 - 65.22 (+0.06/-0.06)
	L-05826	De-Na-Zin	Pu3	T-P Zone	29n	25.6 - 28.4	65.27 - 65.22 (+0.06/-0.06)
	L-05827	De-Na-Zin	Pu3	T-P Zone	29n	25.6 - 28.4	65.27 - 65.22 (+0.06/-0.06)
	L-05828	De-Na-Zin	Pu3	T-P Zone	29n	25.6 - 28.4	65.27 - 65.22 (+0.06/-0.06)
	L-05829	De-Na-Zin	Pu3	T-P Zone	29n	25.6 - 28.4	65.27 - 65.22 (+0.06/-0.06)
	L-05830	De-Na-Zin	Pu3	T-P Zone	29n	25.6 - 28.4	65.27 - 65.22 (+0.06/-0.06)
	L-05831	De-Na-Zin	Pu3	T-P Zone	29n	25.6 - 28.4	65.27 - 65.22 (+0.06/-0.06)
	L-05832	De-Na-Zin	Pu3	T-P Zone	29n	25.6 - 28.4	65.27 - 65.22 (+0.06/-0.06)
	L-05833	De-Na-Zin	Pu3	T-P Zone	29n	25.6 - 28.4	65.27 - 65.22 (+0.06/-0.06)
	L-05834	De-Na-Zin	Pu3	T-P Zone	29n	25.6 - 28.4	65.27 - 65.22 (+0.06/-0.06)
	L-05835	De-Na-Zin	Pu3	T-P Zone	29n	25.6 - 28.4	65.27 - 65.22 (+0.06/-0.06)
	L-05836	De-Na-Zin	Pu3	T-P Zone	29n	25.6 - 28.4	65.27 - 65.22 (+0.06/-0.06)
	L-05837	De-Na-Zin	Pu3	T-P Zone	29n	25.6 - 28.4	65.27 - 65.22 (+0.06/-0.06)
	L-05838	De-Na-Zin	Pu3	T-P Zone	29n	25.6 - 28.4	65.27 - 65.22 (+0.06/-0.06)
	L-05842	De-Na-Zin	Pu3	T-P Zone	29n	25.6 - 28.4	65.27 - 65.22 (+0.06/-0.06)
	L-05864	De-Na-Zin	Pu3	T-P Zone	29n	25.6 - 28.4	65.27 - 65.22 (+0.06/-0.06)
	L-05865	De-Na-Zin	Pu3	T-P Zone	29n	25.6 - 28.4	65.27 - 65.22 (+0.06/-0.06)
	L-06053	De-Na-Zin	Pu3	T-P Zone	29n	25.6 - 28.4	65.27 - 65.22 (+0.06/-0.06)
	L-06054	De-Na-Zin	Pu3	T-P Zone	29n	25.6 - 28.4	65.27 - 65.22 (+0.06/-0.06)
	L-06055	De-Na-Zin	Pu3	T-P Zone	29n	25.6 - 28.4	65.27 - 65.22 (+0.06/-0.06)
	L-06056	De-Na-Zin	Pu3	T-P Zone	29n	25.6 - 28.4	65.27 - 65.22 (+0.06/-0.06)
	L-06057	De-Na-Zin	Pu3	T-P Zone	29n	25.6 - 28.4	65.27 - 65.22 (+0.06/-0.06)
	L-06058	De-Na-Zin	Pu3	T-P Zone	29n	25.6 - 28.4	65.27 - 65.22 (+0.06/-0.06)
	L-06059	De-Na-Zin	Pu3	T-P Zone	29n	25.6 - 28.4	65.27 - 65.22 (+0.06/-0.06)
	L-06060	De-Na-Zin	Pu3	T-P Zone	29n	25.6 - 28.4	65.27 - 65.22 (+0.06/-0.06)
	L-06061	De-Na-Zin	Pu3	T-P Zone	29n	25.6 - 28.4	65.27 - 65.22 (+0.06/-0.06)
	L-06062	De-Na-Zin	Pu3	T-P Zone	29n	25.6 - 28.4	65.27 - 65.22 (+0.06/-0.06)
	L-06063	De-Na-Zin	Pu3	T-P Zone	29n	25.6 - 28.4	65.27 - 65.22 (+0.06/-0.06)
	L-06064	De-Na-Zin	Pu3	T-P Zone	29n	25.6 - 28.4	65.27 - 65.22 (+0.06/-0.06)
	L-06065	De-Na-Zin	Pu3	T-P Zone	29n	25.6 - 28.4	65.27 - 65.22 (+0.06/-0.06)
	L-06066	De-Na-Zin	Pu3	T-P Zone	29n	25.6 - 28.4	65.27 - 65.22 (+0.06/-0.06)
	L-06067	De-Na-Zin	Pu3	T-P Zone	29n	25.6 - 28.4	65.27 - 65.22 (+0.06/-0.06)
	L-06243	De-Na-Zin	Pu3	T-P Zone	29n	25.6 - 28.4	65.27 - 65.22 (+0.06/-0.06)
	L-06253	De-Na-Zin	Pu3	T-P Zone	29n	25.6 - 28.4	65.27 - 65.22 (+0.06/-0.06)
	L-06254	De-Na-Zin	Pu3	T-P Zone	29n	25.6 - 28.4	65.27 - 65.22 (+0.06/-0.06)
	L-06273	De-Na-Zin	Pu3	T-P Zone	29n	25.6 - 28.4	65.27 - 65.22 (+0.06/-0.06)
	L-06274	De-Na-Zin	Pu3	T-P Zone	29n	25.6 - 28.4	65.27 - 65.22 (+0.06/-0.06)
	L-06335	De-Na-Zin	Pu3	T-P Zone	29n	25.6 - 28.4	65.27 - 65.22 (+0.06/-0.06)
	L-06341	De-Na-Zin	Pu3	T-P Zone	29n	25.6 - 28.4	65.27 - 65.22 (+0.06/-0.06)
	L-06360	De-Na-Zin	Pu3	T-P Zone	29n	25.6 - 28.4	65.27 - 65.22 (+0.06/-0.06)
	L-06423	De-Na-Zin	Pu3	T-P Zone	29n	25.6 - 28.4	65.27 - 65.22 (+0.06/-0.06)
	L-06424	De-Na-Zin	Pu3	T-P Zone	29n	25.6 - 28.4	65.27 - 65.22 (+0.06/-0.06)
	L-06425	De-Na-Zin	Pu3	T-P Zone	29n	25.6 - 28.4	65.27 - 65.22 (+0.06/-0.06)
	L-06426	De-Na-Zin	Pu3	T-P Zone	29n	25.6 - 28.4	65.27 - 65.22 (+0.06/-0.06)
	L-06427	De-Na-Zin	Pu3	T-P Zone	29n	25.6 - 28.4	65.27 - 65.22 (+0.06/-0.06)
	L-06428	De-Na-Zin	Pu3	T-P Zone	29n	25.6 - 28.4	65.27 - 65.22 (+0.06/-0.06)
	L-06429	De-Na-Zin	Pu3	T-P Zone	29n	25.6 - 28.4	65.27 - 65.22 (+0.06/-0.06)
	L-06430	De-Na-Zin	Pu3	T-P Zone	29n	25.6 - 28.4	65.27 - 65.22 (+0.06/-0.06)
	L-06431	De-Na-Zin	Pu3	T-P Zone	29n	25.6 - 28.4	65.27 - 65.22 (+0.06/-0.06)
	L-06432	De-Na-Zin	Pu3	T-P Zone	29n	25.6 - 28.4	65.27 - 65.22 (+0.06/-0.06)
	L-06433	De-Na-Zin	Pu3	T-P Zone	29n	25.6 - 28.4	65.27 - 65.22 (+0.06/-0.06)
	L-06487	De-Na-Zin	Pu3	T-P Zone	29n	25.6 - 28.4	65.27 - 65.22 (+0.06/-0.06)
	L-06621	De-Na-Zin	Pu3	T-P Zone	29n	25.6 - 28.4	65.27 - 65.22 (+0.06/-0.06)
	L-08238	De-Na-Zin	Pu3	T-P Zone	29n	25.6 - 28.4	65.27 - 65.22 (+0.06/-0.06)
	L-08336	De-Na-Zin	Pu3	T-P Zone	29n	25.6 - 28.4	65.27 - 65.22 (+0.06/-0.06)
	L-08337	De-Na-Zin	Pu3	T-P Zone	29n	25.6 - 28.4	65.27 - 65.22 (+0.06/-0.06)
	L-08338	De-Na-Zin	Pu3	T-P Zone	29n	25.6 - 28.4	65.27 - 65.22 (+0.06/-0.06)
	L-08339	De-Na-Zin	Pu3	T-P Zone	29n	25.6 - 28.4	65.27 - 65.22 (+0.06/-0.06)
	L-08340	De-Na-Zin	Pu3	T-P Zone	29n	25.6 - 28.4	65.27 - 65.22 (+0.06/-0.06)
	L-08348	De-Na-Zin	Pu3	T-P Zone	29n	25.6 - 28.4	65.27 - 65.22 (+0.06/-0.06)
	L-08349	De-Na-Zin	Pu3	T-P Zone	29n	25.6 - 28.4	65.27 - 65.22 (+0.06/-0.06)
	L-08350	De-Na-Zin	Pu3	T-P Zone	29n	25.6 - 28.4	65.27 - 65.22 (+0.06/-0.06)
	L-08351	De-Na-Zin	Pu3	T-P Zone	29n	25.6 - 28.4	65.27 - 65.22 (+0.06/-0.06)
	L-08352	De-Na-Zin	Pu3	T-P Zone	29n	25.6 - 28.4	65.27 - 65.22 (+0.06/-0.06)
	L-08353	De-Na-Zin	Pu3	T-P Zone	29n	25.6 - 28.4	65.27 - 65.22 (+0.06/-0.06)
	L-08354	De-Na-Zin	Pu3	T-P Zone	29n	25.6 - 28.4	65.27 - 65.22 (+0.06/-0.06)
	L-08355	De-Na-Zin	Pu3	T-P Zone	29n	25.6 - 28.4	65.27 - 65.22 (+0.06/-0.06)
	L-08356	De-Na-Zin	Pu3	T-P Zone	29n	25.6 - 28.4	65.27 - 65.22 (+0.06/-0.06)
	L-08357	De-Na-Zin	Pu3	T-P Zone	29n	25.6 - 28.4	65.27 - 65.22 (+0.06/-0.06)
	L-08361	De-Na-Zin	Pu3	T-P Zone	29n	25.6 - 28.4	65.27 - 65.22 (+0.06/-0.06)
	L-08366	De-Na-Zin	Pu3	T-P Zone	29n	25.6 - 28.4	65.27 - 65.22 (+0.06/-0.06)
	L-08367	De-Na-Zin	Pu3	T-P Zone	29n	25.6 - 28.4	65.27 - 65.22 (+0.06/-0.06)
	L-08368	De-Na-Zin	Pu3	T-P Zone	29n	25.6 - 28.4	65.27 - 65.22 (+0.06/-0.06)
	L-08614	De-Na-Zin	Pu3	T-P Zone	29n	25.6 - 28.4	65.27 - 65.22 (+0.06/-0.06)
	L-08615	De-Na-Zin	Pu3	T-P Zone	29n	25.6 - 28.4	65.27 - 65.22 (+0.06/-0.06)
	L-08856	De-Na-Zin	Pu3	T-P Zone	29n	25.6 - 28.4	65.27 - 65.22 (+0.06/-0.06)
	L-08857	De-Na-Zin	Pu3	T-P Zone	29n	25.6 - 28.4	65.27 - 65.22 (+0.06/-0.06)
	L-08858	De-Na-Zin	Pu3	T-P Zone	29n	25.6 - 28.4	65.27 - 65.22 (+0.06/-0.06)
	L-08859	De-Na-Zin	Pu3	T-P Zone	29n	25.6 - 28.4	65.27 - 65.22 (+0.06/-0.06)
	L-08860	De-Na-Zin	Pu3	T-P Zone	29n	25.6 - 28.4	65.27 - 65.22 (+0.06/-0.06)
	L-08861	De-Na-Zin	Pu3	T-P Zone	29n	25.6 - 28.4	65.27 - 65.22 (+0.06/-0.06)
	L-08862	De-Na-Zin	Pu3	T-P Zone	29n	25.6 - 28.4	65.27 - 65.22 (+0.06/-0.06)
	L-08863	De-Na-Zin	Pu3	T-P Zone	29n	25.6 - 28.4	65.27 - 65.22 (+0.06/-0.06)
	L-08864	De-Na-Zin	Pu3	T-P Zone	29n	25.6 - 28.4	65.27 - 65.22 (+0.06/-0.06)
	L-08884	De-Na-Zin	Pu3	T-P Zone	29n	25.6 - 28.4	65.27 - 65.22 (+0.06/-0.06)
	L-08887	De-Na-Zin	Pu3	T-P Zone	29n	25.6 - 28.4	65.27 - 65.22 (+0.06/-0.06)
	L-10478	De-Na-Zin	Pu3	T-P Zone	29n	25.6 - 28.4	65.27 - 65.22 (+0.06/-0.06)
	L-10479	De-Na-Zin	Pu3	T-P Zone	29n	25.6 - 28.4	65.27 - 65.22 (+0.06/-0.06)
	L-10480	De-Na-Zin	Pu3	T-P Zone	29n	25.6 - 28.4	65.27 - 65.22 (+0.06/-0.06)
	L-10481	De-Na-Zin	Pu3	T-P Zone	29n	25.6 - 28.4	65.27 - 65.22 (+0.06/-0.06)
	L-10482	De-Na-Zin	Pu3	T-P Zone	29n	25.6 - 28.4	65.27 - 65.22 (+0.06/-0.06)
	L-10483	De-Na-Zin	Pu3	T-P Zone	29n	25.6 - 28.4	65.27 - 65.22 (+0.06/-0.06)
	L-10484	De-Na-Zin	Pu3	T-P Zone	29n	25.6 - 28.4	65.27 - 65.22 (+0.06/-0.06)
	L-10485	De-Na-Zin	Pu3	T-P Zone	29n	25.6 - 28.4	65.27 - 65.22 (+0.06/-0.06)
	L-12076	De-Na-Zin	Pu3	T-P Zone	29n	25.6 - 28.4	65.27 - 65.22 (+0.06/-0.06)
	L-12077	De-Na-Zin	Pu3	T-P Zone	29n	25.6 - 28.4	65.27 - 65.22 (+0.06/-0.06)
5	L-00633	Gallegos Canyon	Pu3	T-P Zone	29n	26.5 - 34.5	65.20 - 65.03 (+0.03/-0.01)
	L-00647	Gallegos Canyon	Pu3	T-P Zone	29n	26.5 - 34.5	65.20 - 65.03 (+0.03/-0.01)
	L-00648	Gallegos Canyon	Pu3	T-P Zone	29n	26.5 - 34.5	65.20 - 65.03 (+0.03/-0.01)
	L-00649	Gallegos Canyon	Pu3	T-P Zone	29n	26.5 - 34.5	65.20 - 65.03 (+0.03/-0.01)
	L-00650	Gallegos Canyon	Pu3	T-P Zone	29n	26.5 - 34.5	65.20 - 65.03 (+0.03/-0.01)
	L-00651	Gallegos Canyon	Pu3	T-P Zone	29n	26.5 - 34.5	65.20 - 65.03 (+0.03/-0.01)
	L-00652	Gallegos Canyon	Pu3	T-P Zone	29n	26.5 - 34.5	65.20 - 65.03 (+0.03/-0.01)
	L-00653	Gallegos Canyon	Pu3	T-P Zone	29n	26.5 - 34.5	65.20 - 65.03 (+0.03/-0.01)
	L-00654	Gallegos Canyon	Pu3	T-P Zone	29n	26.5 - 34.5	65.20 - 65.03 (+0.03/-0.01)
	L-00655	Gallegos Canyon	Pu3	T-P Zone	29n	26.5 - 34.5	65.20 - 65.03 (+0.03/-0.01)
	L-00669	Gallegos Canyon	Pu3	T-P Zone	29n	26.5 - 34.5	65.20 - 65.03 (+0.03/-0.01)
	L-00670	Gallegos Canyon	Pu3	T-P Zone	29n	26.5 - 34.5	65.20 - 65.03 (+0.03/-0.01)
	L-00671	Gallegos Canyon	Pu3	T-P Zone	29n	26.5 - 34.5	65.20 - 65.03 (+0.03/-0.01)
	L-00673	Gallegos Canyon	Pu3	T-P Zone	29n	26.5 - 34.5	65.20 - 65.03 (+0.03/-0.01)
	L-00674	Gallegos Canyon	Pu3	T-P Zone	29n	26.5 - 34.5	65.20 - 65.03 (+0.03/-0.01)
	L-01225	Gallegos Canyon	Pu3	T-P Zone	29n	26.5 - 34.5	65.20 - 65.03 (+0.03/-0.01)
	L-01405	Gallegos Canyon	Pu3	T-P Zone	29n	26.5 - 34.5	65.20 - 65.03 (+0.03/-0.01)
	L-02094	Gallegos Canyon	Pu3	T-P Zone	29n	26.5 - 34.5	65.20 - 65.03 (+0.03/-0.01)
	L-02095	Gallegos Canyon	Pu3	T-P Zone	29n	26.5 - 34.5	65.20 - 65.03 (+0.03/-0.01)
	L-02096	Gallegos Canyon	Pu3	T-P Zone	29n	26.5 - 34.5	65.20 - 65.03 (+0.03/-0.01)
	L-02097	Gallegos Canyon	Pu3	T-P Zone	29n	26.5 - 34.5	65.20 - 65.03 (+0.03/-0.01)
	L-02098	Gallegos Canyon	Pu3	T-P Zone	29n	26.5 - 34.5	65.20 - 65.03 (+0.03/-0.01)
	L-02504	Gallegos Canyon	Pu3	T-P Zone	29n	26.5 - 34.5	65.20 - 65.03 (+0.03/-0.01)
	L-02505	Gallegos Canyon	Pu3	T-P Zone	29n	26.5 - 34.5	65.20 - 65.03 (+0.03/-0.01)
	L-02506	Gallegos Canyon	Pu3	T-P Zone	29n	26.5 - 34.5	65.20 - 65.03 (+0.03/-0.01)
	L-02507	Gallegos Canyon	Pu3	T-P Zone	29n	26.5 - 34.5	65.20 - 65.03 (+0.03/-0.01)
	L-02508	Gallegos Canyon	Pu3	T-P Zone	29n	26.5 - 34.5	65.20 - 65.03 (+0.03/-0.01)
	L-02509	Gallegos Canyon	Pu3	T-P Zone	29n	26.5 - 34.5	65.20 - 65.03 (+0.03/-0.01)
	L-02510	Gallegos Canyon	Pu3	T-P Zone	29n	26.5 - 34.5	65.20 - 65.03 (+0.03/-0.01)
	L-02511	Gallegos Canyon	Pu3	T-P Zone	29n	26.5 - 34.5	65.20 - 65.03 (+0.03/-0.01)
6	L-08906	Mesa de Cuba	To1?	P-P Zone	28r	43.0 - 49.5	64.80 - 64.74 (+0.04/-0.02)
7	L-00680	Kimbeto	To1	P-P Zone	28n	57.2 - 64.8	64.66 - 64.58 (+0.02/-0.01)
	L-00681	Kimbeto	To1	P-P Zone	28n	57.2 - 64.8	64.66 - 64.58 (+0.02/-0.01)
	L-00682	Kimbeto	To1	P-P Zone	28n	57.2 - 64.8	64.66 - 64.58 (+0.02/-0.01)
	L-00687	Kimbeto	To1	P-P Zone	28n	57.2 - 64.8	64.66 - 64.58 (+0.02/-0.01)
	L-00688	Kimbeto	To1	P-P Zone	28n	57.2 - 64.8	64.66 - 64.58 (+0.02/-0.01)
	L-00689	Kimbeto	To1	P-P Zone	28n	57.2 - 64.8	64.66 - 64.58 (+0.02/-0.01)
	L-00690	Kimbeto	To1	P-P Zone	28n	57.2 - 64.8	64.66 - 64.58 (+0.02/-0.01)
	L-00691	Kimbeto	To1	P-P Zone	28n	57.2 - 64.8	64.66 - 64.58 (+0.02/-0.01)
	L-00693	Kimbeto	To1	P-P Zone	28n	57.2 - 64.8	64.66 - 64.58 (+0.02/-0.01)
	L-00694	Kimbeto	To1	P-P Zone	28n	57.2 - 64.8	64.66 - 64.58 (+0.02/-0.01)
	L-00695	Kimbeto	To1	P-P Zone	28n	57.2 - 64.8	64.66 - 64.58 (+0.02/-0.01)
	L-00696	Kimbeto	To1	P-P Zone	28n	57.2 - 64.8	64.66 - 64.58 (+0.02/-0.01)
	L-01109	Kimbeto	To1	P-P Zone	28n	57.2 - 64.8	64.66 - 64.58 (+0.02/-0.01)
	L-01110	Kimbeto	To1	P-P Zone	28n	57.2 - 64.8	64.66 - 64.58 (+0.02/-0.01)
	L-02019	Kimbeto	To1	P-P Zone	28n	57.2 - 64.8	64.66 - 64.58 (+0.02/-0.01)
	L-02020	Kimbeto	To1	P-P Zone	28n	57.2 - 64.8	64.66 - 64.58 (+0.02/-0.01)
	L-02713	Kimbeto	To1	P-P Zone	28n	57.2 - 64.8	64.66 - 64.58 (+0.02/-0.01)
	L-06446	Kimbeto	To1	P-P Zone	28n	57.2 - 64.8	64.66 - 64.58 (+0.02/-0.01)
	L-06447	Kimbeto	To1	P-P Zone	28n	57.2 - 64.8	64.66 - 64.58 (+0.02/-0.01)
	L-06494	Kimbeto	To1	P-P Zone	28n	57.2 - 64.8	64.66 - 64.58 (+0.02/-0.01)
	L-06627	Kimbeto	To1	P-P Zone	28n	57.2 - 64.8	64.66 - 64.58 (+0.02/-0.01)
	L-08871	Kimbeto	To1	P-P Zone	28n	57.2 - 64.8	64.66 - 64.58 (+0.02/-0.01)
	L-08872	Kimbeto	To1	P-P Zone	28n	57.2 - 64.8	64.66 - 64.58 (+0.02/-0.01)
	L-08873	Kimbeto	To1	P-P Zone	28n	57.2 - 64.8	64.66 - 64.58 (+0.02/-0.01)
	L-08874	Kimbeto	To1	P-P Zone	28n	57.2 - 64.8	64.66 - 64.58 (+0.02/-0.01)
	L-09223	Kimbeto	To1	P-P Zone	28n	57.2 - 64.8	64.66 - 64.58 (+0.02/-0.01)
	L-09224	Kimbeto	To1	P-P Zone	28n	57.2 - 64.8	64.66 - 64.58 (+0.02/-0.01)
	L-09873	Kimbeto	To1	P-P Zone	28n	57.2 - 64.8	64.66 - 64.58 (+0.02/-0.01)
	L-09874	Kimbeto	To1	P-P Zone	28n	57.2 - 64.8	64.66 - 64.58 (+0.02/-0.01)
	L-09881	Kimbeto	To1	P-P Zone	28n	57.2 - 64.8	64.66 - 64.58 (+0.02/-0.01)
	L-09900	Kimbeto	To1	P-P Zone	28n	57.2 - 64.8	64.66 - 64.58 (+0.02/-0.01)
	L-10437	Kimbeto	To1	P-P Zone	28n	57.2 - 64.8	64.66 - 64.58 (+0.02/-0.01)
8	L-02715	Mesa de Cuba	To1	P-P Zone	28n	69.7 - 71.0	64.52 - 64.50 (+0.03/-0.02)
	L-06604	Mesa de Cuba	To1	P-P Zone	28n	69.7 - 71.0	64.52 - 64.50 (+0.03/-0.02)
	L-06605	Mesa de Cuba	To1	P-P Zone	28n	69.7 - 71.0	64.52 - 64.50 (+0.03/-0.02)
	L-07565	Mesa de Cuba	To1	P-P Zone	28n	69.7 - 71.0	64.52 - 64.50 (+0.03/-0.02)
	L-07566	Mesa de Cuba	To1	P-P Zone	28n	69.7 - 71.0	64.52 - 64.50 (+0.03/-0.02)
	L-07567	Mesa de Cuba	To1	P-P Zone	28n	69.7 - 71.0	64.52 - 64.50 (+0.03/-0.02)
	L-07568	Mesa de Cuba	To1	P-P Zone	28n	69.7 - 71.0	64.52 - 64.50 (+0.03/-0.02)
	L-07569	Mesa de Cuba	To1	P-P Zone	28n	69.7 - 71.0	64.52 - 64.50 (+0.03/-0.02)
	L-08609	Mesa de Cuba	To1	P-P Zone	28n	69.7 - 71.0	64.52 - 64.50 (+0.03/-0.02)
9	L-06492	Betonnie Tsosie	To1	P-P Zone	28n	102 - 109.2	64.49 - 64.44 (+0.05/-0.01)
	L-06493	Betonnie Tsosie	To1	P-P Zone	28n	102 - 109.2	64.49 - 64.44 (+0.05/-0.01)
	L-0613	Betonnie Tsosie	To1	P-P Zone	28n	102 - 109.2	64.49 - 64.44 (+0.05/-0.01)
	L-09973	Betonnie Tsosie	To1	P-P Zone	28n	102 - 109.2	64.49 - 64.44 (+0.05/-0.01)
	L-09974	Betonnie Tsosie	To1	P-P Zone	28n	102 - 109.2	64.49 - 64.44 (+0.05/-0.01)
	L-09975	Betonnie Tsosie	To1	P-P Zone	28n	102 - 109.2	64.49 - 64.44 (+0.05/-0.01)
10	L-08345	De-Na-Zin	To1	P-P Zone	28n	85.6 - 91.0	64.46 - 64.40 (+0.05/-0.03)
	L-04345	De-Na-Zin	To1	P-P Zone	28n	85.6 - 91.0	64.46 - 64.40 (+0.05/-0.03)
	L-06429	De-Na-Zin	To1	P-P Zone	28n	85.6 - 91.0	64.46 - 64.40 (+0.05/-0.03)
	L-06448	De-Na-Zin	To1	P-P Zone	28n	85.6 - 91.0	64.46 - 64.40 (+0.05/-0.03)
	L-06489	De-Na-Zin	To1	P-P Zone	28n	85.6 - 91.0	64.46 - 64.40 (+0.05/-0.03)
	L-08341	De-Na-Zin	To1	P-P Zone	28n	85.6 - 91.0	64.46 - 64.40 (+0.05/-0.03)
11	L-02659	Kutz Canyon	To1	P-P Zone	28n	4.0 - 8.0	63.79 - 63.76 (+0.05/-0.08)
	L-02660	Kutz Canyon	To1	P-P Zone	28n	4.0 - 8.0	63.79 - 63.76 (+0.05/-0.08)
	L-06616	Kutz Canyon	To1	P-P Zone	28n	4.0 - 8.0	63.79 - 63.76 (+0.05/-0.08)
	L-06617	Kutz Canyon	To1	P-P Zone	28n	4.0 - 8.0	63.79 - 63.76 (+0.05/-0.08)
	L-06618	Kutz Canyon	To1	P-P Zone	28n	4.0 - 8.0	63.79 - 63.76 (+0.05/-0.08)
	L-06619	Kutz Canyon	To1	P-P Zone	28n	4.0 - 8.0	63.79 - 63.76 (+0.05/-0.08)
	L-10435	Kutz Canyon	To1	P-P Zone	28n	4.0 - 8.0	63.79 - 63.76 (+0.05/-0.08)
	L-10436	Kutz Canyon	To1	P-P Zone	28n	4.0 - 8.0	63.79 - 63.76 (+0.05/-0.08)
12	L-00624	Kutz Canyon	To2	P-E Zone	27r	42.0 - 46.0	63.48 - 63.44 (+0.01/-0.01)
	L-00625	Kutz Canyon	To2	P-E Zone	27r	42.0 - 46.0	63.48 - 63.44 (+0.01/-0.01)
	L-00627	Kutz Canyon	To2	P-E Zone	27r	42.0 - 46.0	63.48 - 63.44 (+0.01/-0.01)
	L-00628	Kutz Canyon	To2	P-E Zone	27r	42.0 - 46.0	63.48 - 63.44 (+0.01/-0.01)
	L-00678	Kutz Canyon	To2	P-E Zone	27r	42.0 - 46.0	63.48 - 63.44 (+0.01/-0.01)
	L-00848	Kutz Canyon	To2	P-E Zone	27r	42.0 - 46.0	63.48 - 63.44 (+0.01/-0.01)
	L-01258	Kutz Canyon	To2	P-E Zone	27r	42.0 - 46.0	63.48 - 63.44 (+0.01/-0.01)
	L-01259	Kutz Canyon	To2	P-E Zone	27r	42.0 - 46.0	63.48 - 63.44 (+0.01/-0.01)
	L-01260	Kutz Canyon	To2	P-E Zone	27r	42.0 - 46.0	63.48 - 63.44 (+0.01/-0.01)
	L-01261	Kutz Canyon	To2	P-E Zone	27r	42.0 - 46.0	63.48 - 63.44 (+0.01/-0.01)
	L-01263	Kutz Canyon	To2	P-E Zone	27r	42.0 - 46.0	63.48 - 63.44 (+0.01/-0.01)
	L-01397	Kutz Canyon	To2	P-E Zone	27r	42.0 - 46.0	63.48 - 63.44 (+0.01/-0.01)
	L-02629	Kutz Canyon	To2	P-E Zone	27r	42.0 - 46.0	63.48 - 63.44 (+0.01/-0.01)
	L-02630	Kutz Canyon	To2	P-E Zone	27r	42.0 - 46.0	63.48 - 63.44 (+0.01/-0.01)
	L-02716	Kutz Canyon	To2	P-E Zone	27r	42.0 - 46.0	63.48 - 63.44 (+0.01/-0.01)
	L-02717	Kutz Canyon	To2	P-E Zone	27r	42.0 - 46.0	63.48 - 63.44 (+0.01/-0.01)
	L-02718	Kutz Canyon	To2	P-E Zone	27r	42.0 - 46.0	63.48 - 63.44 (+0.01/-0.01)
	L-02726	Kutz Canyon	To2	P-E Zone	27r	42.0 - 46.0	63.48 - 63.44 (+0.01/-0.01)
	L-04334	Kutz Canyon	To2	P-E Zone	27r	42.0 - 46.0	63.48 - 63.44 (+0.01/-0.01)
	L-05645	Kutz Canyon	To2	P-E Zone	27r	42.0 - 46.0	63.48 - 63.44 (+0.01/-0.01)
	L-05646	Kutz Canyon	To2	P-E Zone	27r	42.0 - 46.0	63.48 - 63.44 (+0.01/-0.01)
	L-05647	Kutz Canyon	To2	P-E Zone	27r	42.0 - 46.0	63.48 - 63.44 (+0.01/-0.01)
	L-05648	Kutz Canyon	To2	P-E Zone	27r	42.0 - 46.0	63.48 - 63.44 (+0.01/-0.01)
	L-05649	Kutz Canyon	To2	P-E Zone	27r	42.0 - 46.0	63.48 - 63.44 (+0.01/-0.01)
	L-05650	Kutz Canyon	To2	P-E Zone	27r	42.0 - 46.0	63.48 - 63.44 (+0.01/-0.01)
	L-05651	Kutz Canyon	To2	P-E Zone	27r	42.0 - 46.0	63.48 - 63.44 (+0.01/-0.01)
	L-05866	Kutz Canyon	To2	P-E Zone	27r	42.0 - 46.0	63.48 - 63.44 (+0.01/-0.01)
	L-05867	Kutz Canyon	To2	P-E Zone	27r	42.0 - 46.0	63.48 - 63.44 (+0.01/-0.01)
	L-06268	Kutz Canyon	To2	P-E Zone	27r	42.0 - 46.0	63.48 - 63.44 (+0.01/-0.01)
	L-06422	Kutz Canyon	To2	P-E Zone	27r	42.0 - 46.0	63.48 - 63.44 (+0.01/-0.01)
	L-06510	Kutz Canyon	To2	P-E Zone	27r	42.0 - 46.0	63.48 - 63.44 (+0.01/-0.01)
	L-06511	Kutz Canyon	To2	P-E Zone	27r	42.0 - 46.0	63.48 - 63.44 (+0.01/-0.01)
	L-07853	Kutz Canyon	To2	P-E Zone	27r	42.0 - 46.0	63.48 - 63.44 (+0.01/-0.01)
	L-06998	Kutz Canyon	To2	P-E Zone	27r	42.0 - 46.0	63.48 - 63.44 (+0.01/-0.01)
	L-08876	Kutz Canyon	To2	P-E Zone	27r	42.0 - 46.0	63.48 - 63.44 (+0.01/-0.01)
	L-08877	Kutz Canyon	To2	P-E Zone	27r	42.0 - 46.0	63.48 - 63.44 (+0.01/-0.01)
	L-08878	Kutz Canyon	To2	P-E Zone	27r	42.0 - 46.0	63.48 - 63.44 (+0.01/-0.01)
	L-08879	Kutz Canyon	To2	P-E Zone	27r	42.0 - 46.0	63.48 - 63.44 (+0.01/-0.01)
	L-08880	Kutz Canyon	To2	P-E Zone	27r	42.0 - 46.0	63.48 - 63.44 (+0.01/-0.01)
	L-08881	Kutz Canyon	To2	P-E Zone	27r	42.0 - 46.0	63.48 - 63.44 (+0.01/-0.01)
	L-08882	Kutz Canyon	To2	P-E Zone	27r	42.0 - 46.0	63.48 - 63.44 (+0.01/-0.01)
	L-08883	Kutz Canyon	To2	P-E Zone	27r	42.0 - 46.0	63.48 - 63.44 (+0.01/-0.01)
	L-08885	Kutz Canyon	To2	P-E Zone	27r	42.0 - 46.0	63.48 - 63.44 (+0.01/-0.01)
	L-08886	Kutz Canyon	To2	P-E Zone	27r	42.0 - 46.0	63.48 - 63.44 (+0.01/-0.01)
	L-09883	Kutz Canyon	To2	P-E Zone	27r	42.0 - 46.0	63.48 - 63.44 (+0.01/-0.01)
	L-09884	Kutz Canyon	To2	P-E Zone	27r	42.0 - 46.0	63.48 - 63.44 (+0.01/-0.01)
	L-09898	Kutz Canyon	To2	P-E Zone	27r	42.0 - 46.0	63.48 - 63.44 (+0.01/-0.01)
	L-11788	Kutz Canyon	To2	P-E Zone	27r	42.0 - 46.0	63.48 - 63.44 (+0.01/-0.01)
	L-11789	Kutz Canyon	To2	P-E Zone	27r	42.0 - 46.0	63.48 - 63.44 (+0.01/-0.01)
	L-11790	Kutz Canyon	To2	P-E Zone	27r	42.0 - 46.0	63.48 - 63.44 (+0.01/-0.01)
13	L-01225	Chico Springs	To2	P-E Zone	27r	8.9 - 10.5	63.44 - 63.42 (+0.01/-0.01)
	L-02513	Chico Springs	To2	P-E Zone	27r	8.9 - 10.5	63.44 - 63.42 (+0.01/-0.01)
	L-02543	Chico Springs	To2	P-E Zone	27r	8.9 - 10.5	63.44 - 63.42 (+0.01/-0.01)
	L-02544	Chico Springs	To2	P-E Zone	27r	8.9 - 10.5	63.44 - 63.42 (+0.01/-0.01)
	L-02545	Chico Springs	To2	P-E Zone	27r	8.9 - 10.5	63.44 - 63.42 (+0.01/-0.01)
	L-02546	Chico Springs	To2	P-E Zone	27r	8.9 - 10.5	63.44 - 63.42 (+0.01/-0.01)
	L-02547	Chico Springs	To2	P-E Zone	27r	8.9 - 10.5	63.44 - 63.42 (+0.01/-0.01)
	L-02548	Chico Springs	To2	P-E Zone	27r	8.9 - 10.5	63.44 - 63.42 (+0.01/-0.01)
	L-02549	Chico Springs	To2	P-E Zone	27r	8.9 - 10.5	63.44 - 63.42 (+0.01/-0.01)
	L-04549	Chico Springs	To2	P-E Zone	27r	8.9 - 10.5	63.44 - 63.42 (+0.01/-0.01)
	L-04550	Chico Springs	To2	P-E Zone	27r	8.9 - 10.5	63.44 - 63.42 (+0.01/-0.01)
	L-04552	Chico Springs	To2	P-E Zone	27r	8.9 - 10.5	63.44 - 63.42 (+0.01/-0.01)
	L-04553	Chico Springs	To2	P-E Zone	27r	8.9 - 10.5	63.44 - 63.42 (+0.01/-0.01)
	L-04641	Chico Springs	To2	P-E Zone	27r	8.9 - 10.5	63.44 - 63.42 (+0.01/-0.01)
	L-05847	Chico Springs	To2	P-E Zone	27r	8.9 - 10.5	63.44 - 63.42 (+0.01/-0.01)
	L-05870	Chico Springs	To2	P-E Zone	27r	8.9 - 10.5	63.44 - 63.42 (+0.01/-0.01)
	L-08235	Chico Springs	To2	P-E Zone	27r	8.9 - 10.5	63.44 - 63.42 (+0.01/-0.01)
	L-08236	Chico Springs	To2	P-E Zone	27r	8.9 - 10.5	63.44 - 63.42 (+0.01/-0.01)
	L-08347	Chico Springs	To2	P-E Zone	27r	8.9 - 10.5	63.44 - 63.42 (+0.01/-0.01)
	L-08365	Chico Springs	To2	P-E Zone	27r	8.9 - 10.5	63.44 - 63.42 (+0.01/-0.01)
14	L-00631	Kutz Canyon	To2	E-A Zone	27r	103.0 - 111.0	62.97 - 62.91 (+0.10/-0.08)
	L-01227	Kutz Canyon	To2	E-A Zone	27r	103.0 - 111.0	62.97 - 62.91 (+0.10/-0.08)
	L-01228	Kutz Canyon	To2	E-A Zone	27r	103.0 - 111.0	62.97 - 62.91 (+0.10/-0.08)
	L-01229	Kutz Canyon	To2	E-A Zone	27r	103.0 - 111.0	62.97 - 62.91 (+0.10/-0.08)
	L-01230	Kutz Canyon	To2	E-A Zone	27r	103.0 - 111.0	62.97 - 62.91 (+0.10/-0.08)
	L-01234	Kutz Canyon	To2	E-A Zone	27r	103.0 - 111.0	62.97 - 62.91 (+0.10/-0.08)
	L-01235	Kutz Canyon	To2	E-A Zone	27r	103.0 - 111.0	62.97 - 62.91 (+0.10/-0.08)
	L-01236	Kutz Canyon	To2	E-A Zone	27r	103.0 - 111.0	62.97 - 62.91 (+0.10/-0.08)
	L-01237	Kutz Canyon	To2	E-A Zone	27r	103.0 - 111.0	62.97 - 62.91 (+0.10/-0.08)
	L-01262	Kutz Canyon	To2	E-A Zone	27r	103.0 - 111.0	62.97 - 62.91 (+0.10/-0.08)
	L-01264	Kutz Canyon	To2	E-A Zone	27r	103.0 - 111.0	62.97 - 62.91 (+0.10/-0.08)
	L-01270	Kutz Canyon	To2	E-A Zone	27r	103.0 - 111.0	62.97 - 62.91 (+0.10/-0.08)
	L-01274	Kutz Canyon	To2	E-A Zone	27r	103.0 - 111.0	62.97 - 62.91 (+0.10/-0.08)
	L-01275	Kutz Canyon	To2	E-A Zone	27r	103.0 - 111.0	62.97 - 62.91 (+0.10/-0.08)
	L-01276	Kutz Canyon	To2	E-A Zone	27r	103.0 - 111.0	62.97 - 62.91 (+0.10/-0.08)
	L-01277	Kutz Canyon	To2	E-A Zone	27r	103.0 - 111.0	62.97 - 62.91 (+0.10/-0.08)
	L-01278	Kutz Canyon	To2	E-A Zone	27r	103.0 - 111.0	62.97 - 62.91 (+0.10/-0.08)
	L-01279	Kutz Canyon	To2	E-A Zone	27r	103.0 - 111.0	62.97 - 62.91 (+0.10/-0.08)
	L-01395	Kutz Canyon	To2	E-A Zone	27r	103.0 - 111.0	62.97 - 62.91 (+0.10/-0.08)
	L-02524	Kutz Canyon	To2	E-A Zone	27r	103.0 - 111.0	62.97 - 62.91 (+0.10/-0.08)
	L-02586	Kutz Canyon	To2	E-A Zone	27r	103.0 - 111.0	62.97 - 62.91 (+0.10/-0.08)
	L-02587	Kutz Canyon	To2	E-A Zone	27r	103.0 - 111.0	62.97 - 62.91 (+0.10/-0.08)
	L-02635	Kutz Canyon	To2	E-A Zone	27r	103.0 - 111.0	62.97 - 62.91 (+0.10/-0.08)
	L-02650	Kutz Canyon	To2	E-A Zone	27r	103.0 - 111.0	62.97 - 62.91 (+0.10/-0.08)
	L-02651	Kutz Canyon	To2	E-A Zone	27r	103.0 - 111.0	62.97 - 62.91 (+0.10/-0.08)
	L-02652	Kutz Canyon	To2	E-A Zone	27r	103.0 - 111.0	62.97 - 62.91 (+0.10/-0.08)
	L-05868	Kutz Canyon	To2	E-A Zone	27r	103.0 - 111.0	62.97 - 62.91 (+0.10/-0.08)
	L-04174	Kutz Canyon	To2	E-A Zone	27r	103.0 - 111.0	62.97 - 62.91 (+0.10/-0.08)
	L-04338	Kutz Canyon	To2	E-A Zone	27r	103.0 - 111.0	62.97 - 62.91 (+0.10/-0.08)
	L-06244	Kutz Canyon	To2	E-A Zone	27r	103.0 - 111.0	62.97 - 62.91 (+0.10/-0.08)
	L-06245	Kutz Canyon	To2	E-A Zone	27r	103.0 - 111.0	62.97 - 62.91 (+0.10/-0.08)
	L-06256	Kutz Canyon	To2	E-A Zone	27r	103.0 - 111.0	62.97 - 62.91 (+0.10/-0.08)
	L-06269	Kutz Canyon	To2	E-A Zone	27r	103.0 - 111.0	62.97 - 62.91 (+0.10/-0.08)
	L-06362	Kutz Canyon	To2	E-A Zone	27r	103.0 - 111.0	62.97 - 62.91 (+0.10/-0.08)
	L-06388	Kutz Canyon	To2	E-A Zone	27r	103.0 - 111.0	62.97 - 62.91 (+0.10/-0.08)
	L-06389	Kutz Canyon	To2	E-A Zone	27r	103.0 - 111.0	62.97 - 62.91 (+0.10/-0.08)
	L-06390	Kutz Canyon	To2	E-A Zone	27r	103.0 - 111.0	62.97 - 62.91 (+0.10/-0.08)
	L-06391	Kutz Canyon	To2	E-A Zone	27r	103.0 - 111.0	62.97 - 62.91 (+0.10/-0.08)
	L-06392	Kutz Canyon	To2	E-A Zone	27r	103.0 - 111.0	62.97 - 62.91 (+0.10/-0.08)
	L-06403	Kutz Canyon	To2	E-A Zone	27r	103.0 - 111.0	62.97 - 62.91 (+0.10/-0.08)
	L-06408	Kutz Canyon	To2	E-A Zone	27r	103.0 - 111.0	62.97 - 62.91 (+0.10/-0.08)
	L-06410	Kutz Canyon	To2	E-A Zone	27r	103.0 - 111.0	62.97 - 62.91 (+0.10/-0.08)
	L-06568	Kutz Canyon	To2	E-A Zone	27r	103.0 - 111.0	62.97 - 62.91 (+0.10/-0.08)
	L-06260	Kutz Canyon	To2	E-A Zone	27r	103.0 - 111.0	62.97 - 62.91 (+0.10/-0.08)
	L-06879	Kutz Canyon	To2	E-A Zone	27r	103.0 - 111.0	62.97 - 62.91 (+0.10/-0.08)
	L-06880	Kutz Canyon	To2	E-A Zone	27r	103.0 - 111.0	62.97 - 62.91 (+0.10/-0.08)
	L-06881	Kutz Canyon	To2	E-A Zone	27r	103.0 - 111.0	62.97 - 62.91 (+0.10/-0.08)
	L-06883	Kutz Canyon	To2	E-A Zone	27r	103.0 - 111.0	62.97 - 62.91 (+0.10/-0.08)
	L-08358	Kutz Canyon	To2	E-A Zone	27r	103.0 - 111.0	62.97 - 62.91 (+0.10/-0.08)
	L-08619	Kutz Canyon	To2	E-A Zone	27r	103.0 - 111.0	62.97 - 62.91 (+0.10/-0.08)
	L-08620	Kutz Canyon	To2	E-A Zone	27r	103.0 - 111.0	62.97 - 62.91 (+0.10/-0.08)
	L-08621	Kutz Canyon	To2	E-A Zone	27r	103.0 - 111.0	62.97 - 62.91 (+0.10/-0.08)
	L-08623	Kutz Canyon	To2	E-A Zone	27r	103.0 - 111.0	62.97 - 62.91 (+0.10/-0.08)
	L-08624	Kutz Canyon	To2	E-A Zone	27r	103.0 - 111.0	62.97 - 62.91 (+0.10/-0.08)
	L-08772	Kutz Canyon	To2	E-A Zone	27r	103.0 - 111.0	62.97 - 62.91 (+0.10/-0.08)
	L-08773	Kutz Canyon	To2	E-A Zone	27r	103.0 - 111.0	62.97 - 62.91 (+0.10/-0.08)
	L-08875	Kutz Canyon	To2	E-A Zone	27r	103.0 - 111.0	62.97 - 62.91 (+0.10/-0.08)
	L-08776	Kutz Canyon	To2	E-A Zone	27r	103.0 - 111.0	62.97 - 62.91 (+0.10/-0.08)
	L-09184	Kutz Canyon	To2	E-A Zone	27r	103.0 - 111.0	62.97 - 62.91 (+0.10/-0.08)
Notes: *see table 1 for mammalian horizons, †NALMA zones from Lofgren et al. (2004), §SJB biozones from Williamson (1996), **Stratigraphic position within each measured section for that locality (see figs. 2-4).
